# Supplementary material for: Quick Spreading of Populations of an Exotic Firefly throughout Spain and Their Recent Arrival in the French Pyrenees
Source: Insects. 2022 Jan 29;13(2):148. doi: 10.3390/insects13020148 (PMC8880130; doi:10.3390/insects13020148)
Supplement: Supplementary file 1 [file insects-13-00148-s001.zip]

Archive with 10 entries (6 files):
- insects-sup-1538234/
- insects-sup-1538234/suppl mat/
- insects-sup-1538234/suppl mat/Sup.Data S1-Quick spreading.pdf
- insects-sup-1538234/suppl mat/Table S1-Quick spreading final.xlsx
- insects-sup-1538234/suppl mat/Table S2-Quick spreading-final.xlsx
- insects-sup-1538234/__MACOSX/
- insects-sup-1538234/__MACOSX/suppl mat/
- insects-sup-1538234/__MACOSX/suppl mat/._Sup.Data D1-Quick spreading.pdf
- insects-sup-1538234/__MACOSX/suppl mat/._Table S1-Quick spreading final.xlsx
- insects-sup-1538234/__MACOSX/suppl mat/._Table S2-Quick spreading-final.xlsx
