# Supplementary material for: Quick Spreading of Populations of an Exotic Firefly throughout Spain and Their Recent Arrival in the French Pyrenees
Source: Insects. 2022 Jan 29;13(2):148. doi: 10.3390/insects13020148 (PMC8880130; doi:10.3390/insects13020148)
Supplement: Supplementary file 1 [file insects-13-00148-s001.zip › insects-sup-1538234/suppl mat/Table S1-Quick spreading final.xlsx]

## Sheet: Photinus1
N	Locality	Data	Year	Latitude	Longitude	Observer	Resource	Resource	Resource
1	Sant Joan de Mollet	2016-01-01	2016	42.0489	2.94632	Montserrat Parnau ( Sant Joan de Mollet, contactada per N. Vicens)	Narcís Vicens
2	Mieres	2017-01-01	2017	42.147	2.64239	Toti Martín (conegut Segimon Rovira)	Segimon Rovira
3	Avinyonet de Puigventós	2017-07-15	2017	42.2535	2.91018	Silvia Guitar	Silvia Guitar
4	Sant Joan de Mollet	2017-09-26	2017	42.0497	2.94363	Frances Terrades	Joan Ventura
5	Garrigás	2018-01-01	2018	42.195	2.95644		Zaragoza-Caballero & Viñolas, 2018
6	Corçà	2018-01-01	2018	41.9873	3.01443		GenCat/Cisco Mañas	Viñolas, Vicens & Muñoz-Batet, 2018	Zaragoza-Caballero & Viñolas, 2018
7	Cruilles, Monells y San Sadurní de l'Heura	2018-01-01	2018	42.0177	2.90792		GenCat/Cisco Mañas
8	Verges	2018-01-01	2018	42.0594	3.04376	Lluís Vilanova (conegut Segimon Rovira)	Segimon Rovira
9	Mieres	2018-01-01	2018	42.1232	2.63996		Zaragoza-Caballero & Viñolas, 2018
10	Mieres	2018-01-01	2018	42.147	2.64239	Joan Montserrat	GenCat/Cisco Mañas
11	Sant Ferriol	2018-01-01	2018	42.1864	2.74753	Desconegut, estic buscant qui (R. Carbonell)	Zaragoza-Caballero & Viñolas, 2018
12	Sant Jordi Desvalls	2018-01-01	2018	42.073	2.95613		Zaragoza-Caballero & Viñolas, 2018
13	Esponellá	2018-01-01	2018	42.1719	2.82351	Gerard Dalmau	Zaragoza-Caballero & Viñolas, 2018
14	Cornellá del Terri	2018-08-01	2018	42.1048	2.80865	Giçória Serral	Zaragoza-Caballero & Viñolas, 2018
15	Sant Joan de Mollet	2018-08-05	2018	42.0489	2.94632	Narcís Vicens	Narcís Vicens	Viñolas, Vicens & Muñoz-Batet, 2018	Zaragoza-Caballero & Viñolas, 2018
16	Bordils	2018-08-08	2018	42.0388	2.91697	Narcís Vicens/Pep Muñoz-Batet	GenCat/Cisco Mañas	Viñolas, Vicens & Muñoz-Batet, 2018	Zaragoza-Caballero & Viñolas, 2018
17	Sant Joan de Mollet	2018-08-08	2018	42.0489	2.94632	Narcís Vicens/Josep Muñoz-Batet	Zaragoza-Caballero & Viñolas, 2018
18	Sant Joan de Mollet	2018-08-08	2018	42.0489	2.94632	Narcís Vicens/Pep Muñoz-Batet	Narcís Vicens	Viñolas, Vicens & Muñoz-Batet, 2018	Zaragoza-Caballero & Viñolas, 2018
19	Sant Joan de Mollet	2018-08-09	2018	42.0489	2.94632	Josep Muñoz-Batet	Zaragoza-Caballero & Viñolas, 2018
20	Celrá	2018-08-12	2018	42.0256	2.89366	Narcís Vicens	GenCat/Cisco Mañas	Viñolas, Vicens & Muñoz-Batet, 2018	Zaragoza-Caballero & Viñolas, 2018
21	Flaçá	2018-08-12	2018	42.0477	2.94968	Quim Estévez i Franch i Quique Estévez Reinares	Document Gusanos de Luz
22	Foixá	2018-08-13	2018	42.0607	2.98388	Narcís Vicens	GenCat/Cisco Mañas	Viñolas, Vicens & Muñoz-Batet, 2018	Zaragoza-Caballero & Viñolas, 2018
23	Celrá	2018-08-13	2018	42.025	2.86923	Enric Fábregas (Associació Galanthus)	Document Gusanos de Luz
24	Cerviá de Ter	2018-08-13	2018	42.0662	2.90948	Narcís Vicens	GenCat/Cisco Mañas	Viñolas, Vicens & Muñoz-Batet, 2018	Zaragoza-Caballero & Viñolas, 2018
25	Juiá	2018-08-13	2018	42.0238	2.90912	Narcís Vicens	GenCat/Cisco Mañas	Viñolas, Vicens & Muñoz-Batet, 2018	Zaragoza-Caballero & Viñolas, 2018
26	Sant Joan de Mollet	2018-08-15	2018	42.0489	2.94632	Narcís Vicens/Josep Muñoz-Batet	Zaragoza-Caballero & Viñolas, 2018
27	Corçá	2018-08-24	2018	42.0024	3.03857	Mónica Casanovas Ticó i Eduard de la Arada Janoher	Document Gusanos de Luz
28	Cruilles, Monells y San Sadurní de l'Heura	2018-08-27	2018	41.956	2.99354	Xavier Serres i Josep Maria Vidal	Document Gusanos de Luz
29	Cruilles, Monells y San Sadurní de l'Heura	2018-08-28	2018	41.956	2.99354	Xavier Serres i Josep Maria Vidal	Foto
30	Bordils	2018-08-28	2018	42.0475	2.89192	Josep Armengol	Foto
31	Mieres	2018-09-06	2018	42.147	2.64239	Rafael Carbonell i Joan Montserrat	Col├║lecció
32	Cabanes d'Empordá	2019-01-01	2019	42.3078	2.96026		GenCat/Cisco Mañas
33	Peralada	2019-01-01	2019	42.3064	2.99728	Gerard Carbonell	Gerard Carbonell
34	Sant Miquel de Campmajor	2019-01-01	2019	42.1373	2.68411	Carles Feo	Carles Feo
35	Sant Joan de Mollet	2019-05-25	2019	42.0489	2.94632	Montserrat Perarnau	Narcís Vicens
36	Fortiá	2019-06-01	2019	42.2364	3.03941	Joan Ventura	Joan Ventura
37	Castelló d'Empúries	2019-06-12	2019	42.2317	3.07273	Enric Capalleres	Enric Capalleres
38	Figueres	2019-06-15	2019	42.2732	2.96298	Joan Ventura	Joan Ventura
39	Jafre	2019-06-30	2019	42.0728	3.00738	Jan Tomás	Foto
40	Vilafant	2019-07-30	2019	42.1628	3.03815		GenCat/Cisco Mañas
41	L'Armentera	2019-08-02	2019	42.1686	3.07886		GenCat/Cisco Mañas
42	L'Armentera	2019-08-03	2019	42.1684	3.07829		GenCat/Cisco Mañas
43	Fortiá	2019-08-05	2019	42.2444	3.03137		GenCat/Cisco Mañas
44	Torroella de Fluviá	2019-08-05	2019	42.1915	3.03045		GenCat/Cisco Mañas
45	Ventalló	2019-08-05	2019	42.1628	3.03815		GenCat/Cisco Mañas
46	Vilafant	2019-08-06	2019	42.2461	2.962		GenCat/Cisco Mañas
47	Cabanes d'Empordá	2019-08-10	2019	42.1628	3.03815		GenCat/Cisco Mañas
48	Albons	2019-08-11	2019	42.2275	3.04196		GenCat/Cisco Mañas
49	Riumors	2019-08-13	2019	42.2275	3.04196		GenCat/Cisco Mañas
50	Jafre	2019-08-14	2019	42.0728	3.01069		GenCat/Cisco Mañas
51	L'Armentera	2019-08-15	2019	42.1723	3.0705		GenCat/Cisco Mañas
52	Torroella de Fluviá	2019-08-17	2019	42.1763	3.04124		GenCat/Cisco Mañas
53	Rupiá	2019-08-21	2019	42.0196	3.013		GenCat/Cisco Mañas
54	L'Armentera	2019-08-24	2019	42.1729	3.07169	Josepfeb	https://www.inaturalist.org/observations/31431779
55	Sant Miquel de Fluvià	2019-08-25	2019	42.1717	2.9985	Puigneulos	https://www.inaturalist.org/observations/34577316
56	Sant Pere Pescador	2019-08-26	2019	42.1961	3.0957		GenCat/Cisco Mañas
57	Verges	2019-08-28	2019	42.0654	3.04293		GenCat/Cisco Mañas
58	Mieres	2019-09-04	2019	42.1485	2.64351	Rita Masó	Foto
59	La Tallada d'Empordá	2019-09-05	2019	42.0742	3.05227		GenCat/Cisco Mañas
60	Mieres	2019-09-14	2019	42.1485	2.64351	Rafael Carbonell	Foto
61	Viladamat	2019-09-19	2019	42.1337	3.08293	Manuel Caamaño	https://www.biodiversidadvirtual.org/insectarium/Photinus-immigrans-img1158469.html
62	Argelaguer	2019-10-20	2019	42.0742	3.05227		GenCat/Cisco Mañas
63	L'Escala	2020-01-01	2020	42.1379	3.1102		GenCat/Cisco Mañas
64	Peralada	2020-01-01	2020	42.3064	2.99728	Gerard Carbonell	Gerard Carbonell
65	Rabós d'Empordá	2020-01-01	2020	42.3812	3.02615	Maxime Pastore, Enric Capalleres	Maxime Pastore
66	Banyoles	2020-01-01	2020	42.1152	2.7524		GenCat/Cisco Mañas
67	Fortiá	2020-05-08	2020	42.244	3.03519	Joan Ventura	Joan Ventura
68	Borrassá	2020-05-14	2020	42.2171	2.9298		GenCat/Cisco Mañas
69	Celrá	2020-05-15	2020	42.025	2.86923	Eva Solana	Joan Ventura
70	Sant Mori	2020-05-21	2020	42.1536	2.98778	Mammal	https://www.inaturalist.org/observations/46772846
71	Báscara	2020-05-25	2020	42.1961	2.87004	Mammal	https://www.inaturalist.org/observations/47202168
72	Vilabertran	2020-05-25	2020	42.279	2.98189		GenCat/Cisco Mañas
73	Cabanes d'Empordá	2020-05-26	2020	42.3084	2.97289		GenCat/Cisco Mañas
74	Porqueres	2020-05-27	2020	42.1093	2.78032		GenCat/Cisco Mañas
75	Banyoles	2020-05-29	2020	42.1152	2.75047	Gerard Funosas i Marc Fusellas	Gerard Funosas i Marc Fusellas
76	Banyoles	2020-05-29	2020	42.1163	2.74926	Gerard Funosas i Marc Fusellas	Gerard Funosas i Marc Fusellas
77	Vila-Sacra	2020-06-07	2020	42.2676	3.01843	Jofre Espigulé Pons	https://www.inaturalist.org/observations/48815648
78	Vila-Sacra	2020-06-11	2020	42.2675	3.01852	Jofre Espigulé Pons	https://www.inaturalist.org/observations/49217210
79	Mieres	2020-06-15	2020	42.171	2.74579	Segimon Rovira	https://www.biodiversidadvirtual.org/insectarium/Macho-de-Photinus-immigrans-img1245201.html
80	Fortiá	2020-06-30	2020	42.2347	3.05437	Joan Ventura	https://www.biodiversidadvirtual.org/insectarium/Photinus-immigrans-img1228277.html
81	Mieres	2020-06-30	2020	42.1485	2.64351	Rita Masó	Cita
82	Porqueres	2020-07-02	2020	42.1487	2.75706	Carles Feo	Cita
83	La Jonquera	2020-07-03	2020	42.4337	2.95256	Santi Guallar	Cita
84	Vilafant	2020-07-05	2020	42.2504	2.93746		GenCat/Cisco Mañas
85	Porqueres	2020-07-05	2020	42.1406	2.73233		GenCat/Cisco Mañas
86	Canet d'Adri	2020-07-09	2020	42.0349	2.75894		GenCat/Cisco Mañas
87	Verges	2020-07-16	2020	42.0594	3.04376	Segimon Rovira	Foto
88	Canet d'Adri	2020-07-16	2020	42.0355	2.74304	Davide229	https://www.inaturalist.org/observations/53373378
89	L'Escala	2020-07-20	2020	42.0349	2.75894		GenCat/Cisco Mañas
90	Verges	2020-07-20	2020	42.0594	3.04376	Segimon Rovira	https://www.biodiversidadvirtual.org/insectarium/Photinus-immigrans-img1245216.html
91	Parlavá	2020-07-23	2020	42.0228	3.03353		GenCat/Cisco Mañas
92	Sant Gregori	2020-07-23	2020	41.9917	2.74205		GenCat/Cisco Mañas
93	Banyoles	2020-07-23	2020	42.1141	2.74901	Gerard Dalmau
94	Banyoles	2020-07-23	2020	42.116	2.74899		GenCat/Cisco Mañas
95	La Vall de Campmajor	2020-07-24	2020	42.1368	2.67851		GenCat/Cisco Mañas
96	Banyoles	2020-07-27	2020	42.1161	2.75305	Gerard Dalmau	GenCat/Cisco Mañas
97	Bàscara	2020-07-30	2020	42.1574	2.91202	Ramon19	https://www.inaturalist.org/observations/54880909
98	Peratallada	2020-08-01	2020	41.9765	3.09199		GenCat/Cisco Mañas
99	Banyoles	2020-08-02	2020	42.1163	2.74926	Carles Feo	Carles Feo
100	Banyoles	2020-08-02	2020	42.1259	2.76044	Carles Feo	Carles Feo
101	L'Escala	2020-08-03	2020	42.1114	3.1291		GenCat/Cisco Mañas
102	Sant Gregori	2020-08-03	2020	41.9816	2.75679		GenCat/Cisco Mañas
103	Vila-Sacra	2020-08-07	2020	42.2675	3.0186	Jofre Espigulé Pons	https://www.inaturalist.org/observations/55895896
104	Vilobí d'Onyar	2020-08-07	2020	41.8749	2.71478	Sergi Castro	Foto
105	Serinyá	2020-08-07	2020	42.1702	2.7227		GenCat/Cisco Mañas
106	Torroella de Montgrí	2020-08-08	2020	42.0789	3.11931		GenCat/Cisco Mañas
107	Vilobí d'Onyar	2020-08-08	2020	41.9259	2.73114	Sergi Castro	Foto
108	Vilobí d'Onyar	2020-08-08	2020	41.9242	2.74065		GenCat/Cisco Mañas
109	Castelló d'Empúries	2020-08-09	2020	42.2935	3.12658		GenCat/Cisco Mañas
110	Sant Pere Pescador	2020-08-09	2020	42.192	3.08587		GenCat/Cisco Mañas
111	Vilamacolum	2020-08-09	2020	42.1949	3.05878		GenCat/Cisco Mañas
112	Vilablareix	2020-08-09	2020	41.9543	2.79029		GenCat/Cisco Mañas
113	Vilobí d'Onyar	2020-08-09	2020	41.9217	2.73725	Sergi Castro	Sergi Castro
114	Porqueres	2020-08-09	2020	42.1313	2.74694	Silvia Puig	Silvia Puig
115	Sant Pere Pescador	2020-08-10	2020	42.1949	3.05878		GenCat/Cisco Mañas
116	Cornellá del Terri	2020-08-11	2020	42.1137	2.80426	Joan Parera	https://www.biodiversidadvirtual.org/insectarium/Photinus-immigrans-img1240483.html
117	Cabanes d'Empordá	2020-08-13	2020	42.311	2.95948		GenCat/Cisco Mañas
118	Vila-Sacra	2020-08-13	2020	42.2674	3.01858	Jofre Espigulé Pons	https://www.inaturalist.org/observations/56314448
119	Celrá	2020-08-13	2020	42.0402	2.87228	Sergi Castro	Foto
120	Sant Juliá de Ramis	2020-08-13	2020	42.0269	2.84825		GenCat/Cisco Mañas
121	Cornellá del Terri	2020-08-14	2020	42.1137	2.80452	Joan Parera	https://www.biodiversidadvirtual.org/insectarium/Photinus-immigrans-img1241320.html
122	Sant Climent Sescebes	2020-08-15	2020	42.3701	2.97866		GenCat/Cisco Mañas
123	Torroella de Montgrí	2020-08-15	2020	42.0416	3.14831		GenCat/Cisco Mañas
124	L'Escala	2020-08-15	2020	42.1152	3.12942	Xavier Ballesteros	https://www.biodiversidadvirtual.org/insectarium/Photinus-immigrans-img1242167.html
125	Porqueres	2020-08-15	2020	42.0924	2.71692	Joan Parera	https://www.biodiversidadvirtual.org/insectarium/Photinus-immigrans-img1242055.html
126	Vila-Sacra	2020-08-16	2020	42.2674	3.01858	Jofre Espigulé Pons	https://www.inaturalist.org/observations/56654421
127	Vila-Sacra	2020-08-16	2020	42.2674	3.01858	Jofre Espigulé Pons	https://www.inaturalist.org/observations/56657055
128	Verges	2020-08-16	2020	42.0619	3.02768	Segimon Rovira	Foto
129	Llagostera	2020-08-16	2020	41.8419	2.88936		GenCat/Cisco Mañas
130	L'Escala	2020-08-17	2020	42.1114	3.12708	Apeironmg	https://www.inaturalist.org/observations/56783646
131	Rabós d'Empordá	2020-08-17	2020	42.3794	3.02633		GenCat/Cisco Mañas
132	Rabós d'Empordá	2020-08-17	2020	42.392	3.05343		GenCat/Cisco Mañas
133	Riumors	2020-08-17	2020	42.2302	3.04263	Rosa Maria	Joan Ventura
134	Vilacolum	2020-08-17	2020	42.1965	3.03302		GenCat/Cisco Mañas
135	Verges	2020-08-17	2020	42.0619	3.02768	Segimon Rovira	https://www.biodiversidadvirtual.org/insectarium/Pupa-de-Photinus-immigrans-img1245202.html
136	Verges	2020-08-17	2020	42.0628	3.04578	Mónica Garrido & Pau Clavell	Cita
137	Cassá de la Selva	2020-08-17	2020	41.8511	2.87394		GenCat/Cisco Mañas
138	Sant Gregori	2020-08-17	2020	41.9933	2.74971		GenCat/Cisco Mañas
139	Sant Juliá de Ramis	2020-08-17	2020	42.0247	2.80238		GenCat/Cisco Mañas
140	Garriguella	2020-08-18	2020	42.3398	3.06028		GenCat/Cisco Mañas
141	Llança	2020-08-18	2020	42.37	3.09789		GenCat/Cisco Mañas
142	Palamós	2020-08-18	2020	41.8581	3.12514		GenCat/Cisco Mañas
143	Fontcoberta	2020-08-19	2020	42.1504	2.76664	Carles Feo
144	Porqueres	2020-08-19	2020	42.1504	2.76584	Carles Feo
145	Sant Pere Pescador	2020-08-20	2020	42.1832	3.08902		GenCat/Cisco Mañas
146	Albons	2020-08-22	2020	42.1048	3.09252	Mireia	Joan Ventura
147	Canet d'Adri	2020-08-22	2020	42.0364	2.74943		GenCat/Cisco Mañas
148	Vilobí d'Onyar	2020-08-22	2020	41.9106	2.74936	Sergi Castro	Video
149	Mieres	2020-08-23	2020	42.147	2.64239	Axirgu (amic Pancho Natura Garrotxa)	Foto
150	Vilobí d'Onyar	2020-08-23	2020	41.9106	2.74936	Sergi Castro	Video
151	Maià de Montcal	2020-08-25	2020	42.2223	2.74038	Carme Juanola	Cita
152	Sant Joan de Mollet	2020-08-26	2020	42.0489	2.94632	Narcís Vicens	Narcís Vicens
153	Vilobí d'Onyar	2020-08-26	2020	41.9106	2.74936	Sergi Castro	Video
154	Mieres	2020-08-27	2020	42.1302	2.64708	Marc Dománech	https://www.inaturalist.org/observations/57853457
155	Verges	2020-08-28	2020	42.0607	3.03841	Segimon Rovira	Video
156	Olot	2020-09-01	2020	42.1599	2.53781	Joan Montserrat	Rafael Carbonell
157	Peratallada	2020-09-06	2020	42.3089	3.00534		GenCat/Cisco Mañas
158	Banyoles	2020-09-10	2020	42.1152	2.75047	Gerard Dalmau	Gerard Dalmau
159	Banyoles	2020-09-10	2020	42.1163	2.74926	Gerard Dalmau	Gerard Dalmau
160	Vilablareix	2020-09-12	2020	41.9493	2.79089	Lluís Vilar	Narcís Vicens
161	Argelaguer	2020-09-21	2020	42.0742	3.05227		GenCat/Cisco Mañas
162	Garriguella	2020-09-23	2020	42.3404	3.05901	Maxime Pastore	Maxime Pastore
163	Sant Juliá de Ramis	2020-09-26	2020	42.0274	2.85005	Narcís Rubio	missatge whatsap a Natura Girona
164	Fortiá	2020-10-06	2020	42.2482	3.0338	Joan Ventura	Joan Ventura
165	Santa Coloma de Farners	2020-10-07	2020	41.8744	2.70044	Sergi Castro	Video
166	Besalú	2019-06-01	2019	42.1998	2.69532		Gusanosdeluz
167	Pont de Molins	2019-08-23	2019	42.3146	2.93022		Gusanosdeluz
168	Parlavá	2020-06-06	2020	42.0211	3.03144		Gusanosdeluz
169	Girona ciudad	2020-05-23	2020	41.9796	2.82038		Gusanosdeluz
170	Domeny (Girona)	2020-10-08	2020	41.9923	2.79966		Gusanosdeluz
171	L'Escala	22/08/2020	2020	42.1093	3.14908	fabienchalumeau	iNaturalist
172	Maureillas las Illas(France)			42.4853	2.80254		France
173	Les Cluses (France)			42.4861	2.83836		France
