# Supplementary material for: Quick Spreading of Populations of an Exotic Firefly throughout Spain and Their Recent Arrival in the French Pyrenees
Source: Insects. 2022 Jan 29;13(2):148. doi: 10.3390/insects13020148 (PMC8880130; doi:10.3390/insects13020148)
Supplement: Supplementary file 1 [file insects-13-00148-s001.zip › insects-sup-1538234/suppl mat/Table S2-Quick spreading-final.xlsx]

## Sheet: MAIN
	SOUTH AMERICAN PHOTINUS IMMIGRANS LOOKALIKE																	interesting to contact for samples
	Nº (with photo word doc) - Idobs	locality	municipality	county/province	region	country	ecoregion	date	day	month	year	UTM X	UTM Y	UTM X, Y	Geogràfiques, E, N	latitude	longitude	Observer	source	source2
	1	El Cedro 73, Villa General Belgrano	Calamuchita	Córdoba	Chaco Seco	Argentina	chaco seco	2017-12-03	3	12	2017					-31.973721	-64.554939	Humberto Debat	https://www.inaturalist.org/observations/9092448
	2	Vicente López	Vicente López	Provincia de Buenos Aires	Área Metropolitana de Buenos Aires	Argentina	Delta e Islas del Paraná	2019-10-19	19	10	2019					-34.51388	-58.470956	Seba, sebinio28	https://www.inaturalist.org/observations/60103447
	3	Buenos Aires	Buenos Aires, DF	Provincia de Buenos Aires	Área Metropolitana de Buenos Aires	Argentina	pampa	2019-11-09	9	11	2019					-34.594793	-58.489486	Juan José Bonanno	https://www.inaturalist.org/observations/53426875
	4	Belgrano	Buenos Aires, DF	Provincia de Buenos Aires	Área Metropolitana de Buenos Aires	Argentina	Delta e Islas del Paraná	2019-11-20	20	11	2019					-34.542158	-58.439699	Raúl Orencio	https://www.inaturalist.org/observations/36066055
	5	Avenida Sarmiento 3082-3100	Buenos Aires, DF	Provincia de Buenos Aires	Área Metropolitana de Buenos Aires	Argentina	pampa	2020-03-16	16	3	2020					-34.576943	-58.416209	sebastián fornés	https://www.inaturalist.org/observations/41019842
	6	Puerto Madero	Buenos Aires, DF	Provincia de Buenos Aires	Área Metropolitana de Buenos Aires	Argentina	pampa	2019-11-03	3	11	2019					-34.608063	-58.350964	"RAP"	https://www.inaturalist.org/observations/35325161
	7	Lago de Regatas	Buenos Aires, DF	Provincia de Buenos Aires	Área Metropolitana de Buenos Aires	Argentina	pampa	2019-02-24	24	2	2019					-34.560129	-58.430534	"RAP"	https://www.inaturalist.org/observations/20787769
	8	Ensenada	Ensenada	Provincia de Buenos Aires	Área Metropolitana de Buenos Aires	Argentina	pampa	2018-12-02	2	12	2018					-34.845899	-57.955657	Martin Arregui ; Curator	https://www.inaturalist.org/observations/18805968
	9	n.a354, MO, UY	Montevideo	Montevideo	Uruguay	Uruguay	pampa	2019-11-27	27	11	2019					-34.857444	-56.157688	Pablo Balduvino	https://www.inaturalist.org/observations/36166849
	10	Sobre Calle La Rioja, entre Neuquen y Champanian, Villa La Bolsa	Santa María	Córdoba	Chaco Seco	Argentina	chaco seco	2019-12-16	16	12	2019					-31.727054	-64.428222	Luis Carlos De Volder	http://www.ecoregistros.org/site/imagen.php?id=370411
	11	Béccar	San Isidro	Provincia de Buenos Aires	Área Metropolitana de Buenos Aires	Argentina	pampa	2019-11-05	5	11	2019					-34.454347	-58.527452	Diego Alfonso Rosa	http://www.ecoregistros.org/site/registro.php?id=1128786		http://www.ecoregistros.org/site/imagen.php?id=361344
	12	El Timbo	Rosario de Lerma	Salta	Chaco Seco	Argentina	pampa	2018-11-20	20	11	2019					-25.011755	-65.557781	Gustavo Peretti	http://www.ecoregistros.org/site/imagen.php?id=299720
	13	Parque Lago Nautical	Dolores	Provincia de Buenos Aires	Área Metropolitana de Buenos Aires	Argentina	pampa	2015-03-04	4	3	2015					-36.322888	-57.728015	Jorge Iriberri	http://www.ecoregistros.org/site/imagen.php?id=198108
	14	Costa Rio Paraná Guazú, Camping Ipona Guazú	Entre Ríos	Entre Ríos	La Pampa	Argentina	pampa	2017-10-06	6	10	2017					-33.894139	-58.886923	Diego Alfonso Rosa	https://www.ecoregistros.org/site/imagen.php?id=222344
	15	El Bermejo	Guaymallén	Mendoza	Mendoza	Argentina	Andes	2019-02-05	5	2	2019					-32.8661	-68.7919	Marcelo Zanotti	http://www.ecoregistros.org/site/imagen.php?id=320878%20
	16	n.a338, Gral. Artigas y Ramón López	Aguas Corrientes	Canelones	Uruguay	Uruguay	pampa	2018-11-10	10	11	2018					-34.523907	-56.396187	miguel latronico	https://www.inaturalist.org/observations/18316136
	17	Dique Luján	Tigre	Provincia de Buenos Aires	Área Metropolitana de Buenos Aires	Argentina	pampa	2016-10-12	12	10	2016					-34.376474	-58.677777	Lucas Rubio	http://www.ecoregistros.org/site/imagen.php?id=187582
	18	Béccar	San Isidro	Provincia de Buenos Aires	Área Metropolitana de Buenos Aires	Argentina	pampa	2017-10-23	23	10	2017					-34.454260	-58.527231	Diego Alfonso Rosa	http://www.ecoregistros.org/site/imagen.php?id=245055
	19	Alejandro Korn	San Vicente	Provincia de Buenos Aires	Área Metropolitana de Buenos Aires	Argentina	pampa	2018-11-16	16	11	2018					-34.978166	-58.382087	Mariano Kildegaard	http://www.ecoregistros.org/site/imagen.php?id=310238
	20	Camino de la Costa, Gualeguaychú	Gualeguaychú	Entre Ríos	La Pampa	Argentina	pampa	2019-01-01	1	1	2019					-33.024191	-58.506406	Gustavo Puente	http://www.ecoregistros.org/site/imagen.php?id=327273
	21	Coronel Brandsen	Coronel Brandsen	Provincia de Buenos Aires	Área Metropolitana de Buenos Aires	Argentina	pampa	2019-02-20	20	2	2019					-35.173188	-58.248460	Eduardo Nadal	http://www.ecoregistros.org/site/imagen.php?id=318191
	22	Béccar	San Isidro	Provincia de Buenos Aires	Área Metropolitana de Buenos Aires	Argentina	pampa	2019-04-02	2	4	2019					-34.454255	-58.527499	Diego Alfonso Rosa	http://www.ecoregistros.org/site/registro.php?id=905121
	23	Av, San Martín	Maipú	Provincia de Buenos Aires	La Pampa	Argentina	pampa	2020-01-31	31	1	2020					-36.868984	-57.881428	"Emiss"	https://www.inaturalist.org/observations/38162436
	24	El Cedro 73, Villa General Belgrano	Calamuchita	Córdoba	Chaco Seco	Argentina	chaco seco	2017-12-10	10	12	2017					-31.973827	-64.554619	Humberto Debat	https://www.inaturalist.org/observations/9117905
	25	INTA Experimental	Concordia	Entre Ríos	Espinal	Argentina	espinal, pampa	2019-11-09	9	11	2019					-31.370201	-58.117955	Eduardo Luis Beltrocco	https://www.inaturalist.org/observations/35608451
	26	El Palmar	Colón	Entre Ríos	La Pampa	Argentina	pampa	2018-10-14	14	10	2018					-31.870622	-58.215605	Gerónimo Martín Alonso Curator	https://www.inaturalist.org/observations/19868490	https://www.inaturalist.org/observations/18339097
	27	Manuel Alberti	Pilar	Provincia de Buenos Aires	Área Metropolitana de Buenos Aires	Argentina	pampa	2019-12-07	7	12	2019					-34.448396	-58.770621	Gonzalo Roget Curator	https://www.inaturalist.org/observations/36481364
	28	Isla Martín García	San Fernando	Provincia de Buenos Aires	Área Metropolitana de Buenos Aires	Argentina	Delta e Islas del Paraná	2019-11-17	17	11	2019					-34.185405	-58.253544	Gerónimo Martín Alonso Curator	https://www.inaturalist.org/observations/36825861
	29	Arroyo Gaviota	Tigre	Provincia de Buenos Aires	Área Metropolitana de Buenos Aires	Argentina	pampa	2015-12-08	8	12	2015					-34.359168	-58.578894	Pablo Bombín Curator	https://www.inaturalist.org/observations/47019535
	30	Dique Luján	Tigre	Provincia de Buenos Aires	Área Metropolitana de Buenos Aires	Argentina	pampa	2018-10-27	27	10	2018					-34.371729	-58.688091	Lucas Rubio Curator	https://www.inaturalist.org/observations/18558716
	31	Obelisco	Buenos Aires, DF	Provincia de Buenos Aires	Área Metropolitana de Buenos Aires	Argentina	pampa	2019-12-01	1	12	2019					-34.603684	-58.381559	"RAP"	https://www.inaturalist.org/observations/50987617
	32	Presidente Derqui	Pilar	Provincia de Buenos Aires	Área Metropolitana de Buenos Aires	Argentina	pampa	2020-10-26	26	10	2020					-34.480737	-58.829007	Diego Emmanuel Oscar	https://www.inaturalist.org/observations/63602039
	33	Acassuso	San Isidro	Provincia de Buenos Aires	Área Metropolitana de Buenos Aires	Argentina	Delta e Islas del Paraná	2019-12-07	7	12	2019					-34.467606	-58.493659	Roberto Guller	https://www.inaturalist.org/observations/36879280
	34	Lago Lugano	Buenos Aires, DF	Provincia de Buenos Aires	Área Metropolitana de Buenos Aires	Argentina	pampa	2020-10-23	23	10	2020					-34.678911	-58.447733	"RAP"	https://www.inaturalist.org/observations/63592704
	35	Reserva Ecológica Costanera Sur, Camino de los Alisos	Buenos Aires, DF	Provincia de Buenos Aires	Área Metropolitana de Buenos Aires	Argentina	pampa	2019-01-21	21	1	2019					-34.598427	-58.352802	Leonel Roget	https://www.inaturalist.org/observations/19792046
	36	Reserva Ecológica Costanera Sur	Buenos Aires, DF	Provincia de Buenos Aires	Área Metropolitana de Buenos Aires	Argentina	pampa	2020-10-13	13	10	2020					-34.61443	-58.351151	Lorena Zapata	https://www.inaturalist.org/observations/62719275
	37	Ceibas	Ceibas	Entre Ríos	La Pampa	Argentina	pampa	2014-10-25	25	10	2014					-33.497942	-58.803612	Alec Earnshaw	https://www.fotosaves.com.ar/FotosInsectos/FotosInsectos.html
new data since 29/11/2020 checked	38	San Carlos	San Carlos	Maldonado	Uruguay	Uruguay	pampa	2020-11-25	25	11	2020					-34.800555	-54.979682	bert_in_the_skirt	https://www.inaturalist.org/observations/65631338
	39	City Bell	La Plata	Provincia de Buenos Aires	Área Metropolitana de Buenos Aires	Argentina	pampa	2020-11-18	18	11	2020					-34.877667	-58.072107	Roberto Battaglia	https://www.inaturalist.org/observations/65584286
	40	Dique Luján	Tigre	Provincia de Buenos Aires	Área Metropolitana de Buenos Aires	Argentina	pampa	2020-11-19	19	11	2020					-34.382278	-58.680114	Luis Martinez Villa	https://www.inaturalist.org/observations/65269471
	41	Reserva natural urbana "Delfín Perez"	Maracó	La Pampa	La Pampa	Argentina	pampa	2020-11-14	14	11	2020					-35.679362	-63.697345	Margarita Cervio	https://www.inaturalist.org/observations/65241011
	42	Aceitera	General Villegas	Provincia de Buenos Aires	La Pampa	Argentina	pampa	2020-11-15	15	11	2020					-35.00517	-62.990891	Verónica André	https://www.inaturalist.org/observations/65008008
	43	Lobería	Lobería	Provincia de Buenos Aires	Área Metropolitana de Buenos Aires	Argentina	pampa	2020-11-14	14	11	2020					-38.415533	-58.730415	Ricardo Ernesto Doumecq Milieu	https://www.inaturalist.org/observations/64859026
	44	Albergue Universitario, Berisso	Berisso	Provincia de Buenos Aires	Área Metropolitana de Buenos Aires	Argentina	pampa	2020-11-13	13	11	2020					-34.872056	-57.888765	isadora	https://www.inaturalist.org/observations/64780035
	45	Avenida Sarmiento 3126-3400, Palermo	Buenos Aires, DF	Provincia de Buenos Aires	Área Metropolitana de Buenos Aires	Argentina	pampa	2020-10-28	28	10	2020					-34.57644	-58.4159	Rodrigo Carrera	https://www.inaturalist.org/observations/64556725
	46	Lago Lugano	Buenos Aires, DF	Provincia de Buenos Aires	Área Metropolitana de Buenos Aires	Argentina	pampa	2020-10-27	27	10	2020					-34.681132	-58.44516	"RAP"	https://www.inaturalist.org/observations/64260800
new since 14/12/2020 added	47	Av. H. Yrigoyen pasando 25 de Mayo, La Merced	Cerrillos	Salta	Chaco Seco	Argentina	chaco seco	2020-12-06	6	12	2020					-24.961918	-65.486846	Sol Quipildor	https://www.inaturalist.org/observations/66230021
new between 14/12/2020-07/03/2021	48	Islas del Ibiquy	Islas del Ibiquy	Entre Ríos	La Pampa	Argentina	pampa	2002-12-06	6	12	2020					-33.500575	-58.794945	"RAP"	https://www.inaturalist.org/observations/66580476
	49	Bario Santa Guadalupe	Pilar	Provincia de Buenos Aires	Área Metropolitana de Buenos Aires	Argentina	pampa	2020-12-17	17	12	2020					-34.393045	-58.887658	Ezeq DeRegibus	https://www.inaturalist.org/observations/66718299
	50	Coronel Moldes	Río cuarto	Córdoba	La Pampa	Argentina	pampa	2020-12-25	25	12	2020					-33.597111	-64.450334	Emmanuel Zufiaurre	https://www.inaturalist.org/observations/67070783
	51	Gualeguay	Gualeguay	Entre Ríos	La Pampa	Argentina	pampa	2021-01-29	3	1	2021					-33.133798	-59.33526	nico chimento	https://www.inaturalist.org/observations/68934936
	52	Balneario Buenos Aires ,n.a337	Maldonado	Maldonado	Uruguay	Uruguay	pampa	2021-03-06	6	3	2021					-34.879917	-54.814071	Francisco Liguori	https://www.inaturalist.org/observations/70739419
	53	Abasto	Buenos Aires, DF	Provincia de Buenos Aires	Área Metropolitana de Buenos Aires	Argentina	pampa	2021-02-21	21	2	2021					-35.054681	-58.12093	Abril Bastons	https://www.inaturalist.org/observations/70147416
	54	Guyunusa, Sección 03,	Guyunusa	Rio Negro	Uruguay	Uruguay	pampa	2021-02-24	24	2	2021					-32.52893	-58.038158	Santiago Mailhos	https://www.inaturalist.org/observations/70121583
	55	Chacra del molino	Estación de la Cruz	Provincia de Buenos Aires	Área Metropolitana de Buenos Aires	Argentina	pampa	2021-02-23	23	2	2021					-34.376342	-59.067247	Federico "buddyfede"	https://www.inaturalist.org/observations/70059457
	56	Álvarez de Toledo	Saladillo	Provincia de Buenos Aires	Área Metropolitana de Buenos Aires	Argentina	pampa	2021-02-08	8	2	2021					-35.638831	-59.628177	Juan Manuel Atencio	https://www.inaturalist.org/observations/69646262
	57	Las Bardas	Confluencia	Neuquén	Patagonia	Argentina	Monte de Llanuras y Mesetas	2021-02-13	13	2	2021					-38.927794	-68.047397	inecaatro	https://www.inaturalist.org/observations/69534366
nieuw online gevonden april2021	58	Cazadores & Echeverría	Buenos Aires, DF	Provincia de Buenos Aires	Área Metropolitana de Buenos Aires	Argentina	pampa	2019-04-07	7	4	2019					-34.55499	-58.442549	María Belén Dri	https://www.inaturalist.org/observations/75447143
	59	Luján	Luján	Provincia de Buenos Aires	Área Metropolitana de Buenos Aires	Argentina	pampa	2021-03-12	12	3	2021					-34.563308	-59.120881	Candela Escudero	https://www.inaturalist.org/observations/75359106
	60	Trujui	Moreno	Provincia de Buenos Aires	Área Metropolitana de Buenos Aires	Argentina	pampa	2021-04-15	15	4	2021					-34.587834	-58.747712	jfps	https://www.inaturalist.org/observations/74041936
	61	Florencio Varela	Florecio Varela	Provincia de Buenos Aires	Área Metropolitana de Buenos Aires	Argentina	pampa	2020-11-29	29	11	2019					-34.783426	-58.266433	Gabriel Albelda	https://www.inaturalist.org/observations/65793673
	62	Reserva Natural El Destino	Magdalena	Provincia de Buenos Aires	Área Metropolitana de Buenos Aires	Argentina	pampa	2009-04-10	10	4	2009					-35.137073	-57.391473	Diego Ese olivera	https://www.inaturalist.org/observations/65585468
	63	Lago Lugano	Buenos Aires, DF	Provincia de Buenos Aires	Área Metropolitana de Buenos Aires	Argentina	pampa	2020-10-23	23	10	2020					-34.681132	-58.44516	RAP	https://www.inaturalist.org/observations/63592695
	64	Lago Lugano	Buenos Aires, DF	Provincia de Buenos Aires	Área Metropolitana de Buenos Aires	Argentina	pampa	2020-10-23	23	10	2020					-34.681132	-58.44516	RAP	https://www.inaturalist.org/observations/63480745
	65	Lago Lugano	Buenos Aires, DF	Provincia de Buenos Aires	Área Metropolitana de Buenos Aires	Argentina	pampa	2020-10-21	21	10	2020					-34.681132	-58.44516	RAP	https://www.inaturalist.org/observations/63279869
	66	Villa Crespo	Buenos Aires, DF	Provincia de Buenos Aires	Área Metropolitana de Buenos Aires	Argentina	pampa	2019-01-19	19	1	2019					-34.601424	-58.443357	RAP	https://www.inaturalist.org/observations/59144904
	67	Intendente Güiraldes 2160	Buenos Aires, DF	Provincia de Buenos Aires	Área Metropolitana de Buenos Aires	Argentina	pampa	2018-12-23	23	12	2018					-34.538547	-58.443664	Isis Ibáñez	https://www.inaturalist.org/observations/56677379
	68	Isla Martín García	San Fernando	Provincia de Buenos Aires	Área Metropolitana de Buenos Aires	Argentina	Delta e Islas del Paraná, AR	2019-11-17	17	11	2019					-34.182483	-58.249109	Juan José Bonanno	https://www.inaturalist.org/observations/53558355
	69	Acassuso	San Isidro	Provincia de Buenos Aires	Área Metropolitana de Buenos Aires	Argentina	Delta e Islas del Paraná, AR	2020-03-07	7	3	2020					-34.470017	-58.496232	RAP	https://www.inaturalist.org/observations/39798626
	70	Acassuso	San Isidro	Provincia de Buenos Aires	Área Metropolitana de Buenos Aires	Argentina	Delta e Islas del Paraná, AR	2019-12-07	7	12	2019					-34.470017	-58.496232	RAP	https://www.inaturalist.org/observations/42035277
	71	La Merced	Cerillos	Salta	Salta	Argentina	chaco seco	2020-02-09	9	2	2019					-24.961908	-65.486782	Sol Quipildor	https://www.inaturalist.org/observations/38488652
	72	La Plata	La Plata	Provincia de Buenos Aires	Área Metropolitana de Buenos Aires	Argentina	pampa	2019-11-25	25	11	2019					-34.90748	-57.929908	Michelle Delaloye	https://www.inaturalist.org/observations/36122001
	73	Reserva ecológica Ciudad Universitaria Costanera	Buenos Aires, DF	Provincia de Buenos Aires	Área Metropolitana de Buenos Aires	Argentina	Delta e Islas del Paraná, AR	2014-10-25	25	10	2014					-34.538275	-58.444113	Juan José Bonanno	https://www.inaturalist.org/observations/25925424
	74	Establecimiento Los Quebrachos	Sargento Cabral	Chaco	Chaco Húmedo	Argentina	Chaco Húmedo, ARRegion	2019-01-30	30	1	2019					-26.810796	-59.596997	Eduardo Luis Beltrocco	https://www.inaturalist.org/observations/25264292
	75	Barrancas de Belgrano	Buenos Aires, DF	Provincia de Buenos Aires	Área Metropolitana de Buenos Aires	Argentina	pampa	2019-04-07	7	4	2019					-34.554274	-58.441022	Diego Carús	https://www.inaturalist.org/observations/22166563
	77
	78
	23	Inta Estación Experimental, Concordia	Concordia	Entre Ríos				2019-11-09	9	11	2019					-31.370201	-58.117955	Eduardo Beltrocco	http://www.ecoregistros.org/site/registro.php?id=1209748		REPETIDO
	80
	81
	82
	83
	84
	85
	86
	87
	88
	89
	90
	91
	92
	93
	94
	95
	96
	97
	98
	99
	100
	101
	102
	103
	104
	105
	106
	107
	108
	109
	110
	111
	112
	113
	114
	115
	116
	117
	118
	119
	120
	121
	122
	123
	124
	125
	126
	127
	128
	129
	130
	131
	132
	133
	134
	135
	136
	137
	138
	139
	140
	141
	142
	143
	144
	145
	146
	147
	148
	149
	150
	151
	152
	153
	154
	155
	156
	157
	158
	159
	160
	161
	162
	163
	164
	165
	166
	167
	168
	169
	170
	171
	172
	173
	174
	175
	176
	177
	178
	179
	180
	181
	182
	183
	184
	185
	186
	187
	188
	189
	190
	191
	192
	193
	194
	195
	196
	197
	198
	199
	200
	201
	202
	203
	204
	205
	206
	207
	208
	209
	210
	211
	212
	213
	214
	215
	216
	217
	218
	219
	220
	221
	222
	223
	224
	225
	226

## Sheet: Hoja2
Nº (with photo word doc) - Idobs	locality	municipality	latitude	longitude
1	El Cedro 73, Villa Gral. Belgrano, Córdoba, Argentina	Villa Gral. Belgrano	Lat: -31.973721	Lon: -64.554939
2	Vicente López, Buenos Aires, Provincia de Buenos Aires, Argentina	Vicente López	Lat: -34.51388	Lon: -58.470956
3	Buenos Aires	Buenos Aires	Lat: -34.594793	Lon: -58.489486
4	Belgrano	Belgrano, Buenos Aires	Lat: -34.542158	Lon: -58.439699
5	Avenida Sarmiento 3082-3100, Buenos Aires, Argentina	Buenos Aires	Lat: -34.576943	Lon: -58.416209
6	Puerto Madero, CABA, Argentina	Buenos Aires	Lat: -34.608063	Lon: -58.350964
7	Lago de Regatas, Buenos Aires, Argentina	Buenos Aires	Lat: -34.560129	Lon: -58.430534
8	Ensenada, Buenos Aires, Argentina	Ensenada	Lat: -34.845899	Lon: -57.955657
9	poblacion: n.a354, MO, UY	Montevideo	-34.857444	Lon: -56.157688
10	Sobre Calle La Rioja, entre Neuquen y Champanian	Villa La Bolsa	-31.727054	-64.428222
11	Béccar, Buenos Aires	Béccar, Buenos Aires	-34.454347	-58.527452
12	El Timbo, Rosario de Lerma	Rosario de Lerma	-25.011755	-65.557781
13	Parque Lago Nautical (CAND), Dolores	Dolores	-36.322888	-57.728015
14	Costa Rio Paraná Guazú, Camping Ipona Guazú		-33.894139	-58.886923
15	El Bermejo		-32.8661	-68.7919
16	n.a338, CA, UY Poblacion, Gral. Artigas Y Ramon Lopez, Aguas Corrientes, Departamento de Canelones, Uruguay	Aguas Corrientes, Departamento de Canelones, Uruguay	Lat: -34.523907	Lon: -56.396187
17	Dique Luján; Baja	Dique Luján; Baja	lat -34.376474	long -58.677777
18	Beccar, Beccar	Beccar, Beccar	-34.454260	-58.527231
19	Alejandro Korn, San Vicente	San Vicente	-34.978166	-58.382087
20	Camino de la Costa, Gualeguaychú	Gualeguaychú	-33.024191	-58.506406
21	Coronel Brandsen	Buenos Aires	-35.173188	-58.248460
22	Beccar, Beccar	Beccar, Beccar	-34.454255	-58.527499
23	Inta Estación Experimental, Concordia	Concordia	-31.370201	-58.117955
23	Av, San Martín, Maipú	Maipú	-36.868984	Lon: -57.881428
24	El Cedro 73, Villa Gral. Belgrano, Córdoba, Argentina	Villa Gral. Belgrano, Córdoba, Argentina	lat: -31.973827	Lon: -64.554619
25	INTA EXPERIMENTAL CONCORDIA	Concordia	Lat: -31.370201	Lon: -58.117955
26	El Palmar, Colón Department, Entre Rios, Argentina	Colón	Lat: -31.870622	Lon: -58.215605
27	Manuel Alberti,	Buenos Aires	Lat: -34.448396	Lon: -58.770621
28	San Fernando (1), Martín García Island	Buenos Aires	Lat: -34.185405	Lon: -58.253544
29	Arroyo Gaviota, Tigre	Tigre	Lat: -34.359168	Lon: -58.578894
30	Dique Luján; Baja	Tigre	Lat: -34.371729	Lon: -58.688091
31	Obelisco, Buenos Aires	Buenos Aires	Lat: -34.603684	Lon: -58.381559
32	Presidente Derqui, Pilar	Pilar	Lat: -34.480737	Lon: -58.829007
33	Acassuso	San Isidro	Lat: -34.467606	Lon: -58.493659
34	Lago Lugano	Buenos Aires	Lat: -34.681132	Lon: -58.44516
35	Reserva Ecológica Costanera Sur, Camino de los Alisos, Buenos Aires	Buenos Aires	Lat: -34.598427	Lon: -58.352802
36	Reserva Ecológica Costanera Sur	Buenos Aires	Lat: -34.61443	Lon: -58.351151
37	Ceibas	Ceibas	-33.497942	-58.803612
38	n.a351, Maldonado	Maldonado	Lat: -34.800555	Lon: -54.979682
39	City Bell, La Plata, Buenos Aires	La Plata	Lat: -34.877667	Lon: -58.072107
40	Dique Luján	Tigre	Lat: -34.382278	Lon: -58.680114
41	Reserva natural urbana "Delfín Perez"	Maracó	Lat: -35.679362	Lon: -63.697345
42	Aceteiras, General Villegas	General Villegas	Lat: -35.00517	Lon: -62.990891
43	Pieres	Lobería	Lat: -38.415533	Lon: -58.730415
44	Albergue Universitario, Berisso	Berisso	Lat: -34.872056	Lon: -57.888765
45	Avenida Sarmiento 3126-3400, Palermo, Buenos Aires, Argentina		Lat: -34.57644	Lon: -58.4159
46	Lago Lugano	Buenos Aires	Lat: -34.681132	Lon: -58.44516
47	Av. H. Yrigoyen pasando 25 de Mayo, La Merced, Salta, Argentina	La Merced, Cerillos	Lat: -24.961918	Lon: -65.486846
48	Ceibas	Entre Ríos	Lat: -33.500575	Lon: -58.794945
49	Bario Santa Guadalpe, Pilar	Pilar	Lat: -34.393045	Lon: -58.887658
50	Coronel Moldes, Rió Cuarto	Rió Cuarto	Lat: -33.597111	Lon: -64.450334
51	Gualeguay	Gualeguay	Lat: -33.133798	Lon: -59.33526
52	Balneario Buenos Aires ,n.a337, MA, UY	Maldonado	-34.879917	Lon: -54.814071
53	Abasto	La Plata	Lat: -35.054681	Lon: -58.12093
54	Ruta 24 Guyunusa, Sección 03, Rio Negro, UY		Lat: -32.52893	Lon: -58.038158
55	chacra del molino	Exaltación de la Cruz	Lat: -34.376342	Lon: -59.067247
56	Alvarez de Toledo	Saladillo	Lat: -35.638831	Lon: -59.628177
57	Las Bardas, Confluencia, Neuquén	Río Negro	Lat: -38.927794	Lon: -68.047397
58	Cazadores & Echeverría	Buenos Aires	Lat: -34.55499	Lon: -58.442549
59	Luján	Buenos Aires	Lat: -34.563308	Lon: -59.120881
60	Trujui	Moreno	Lat: -34.587834	Lon: -58.747712
61	Florencio Varela	Buenos Aires	Lat: -34.783426	Lon: -58.266433
62	ruta 11, B1913 Magdalena	Buenos Aires	Lat: -35.137073	Lon: -57.391473
63	Lago Lugano	Buenos Aires	Lat: -34.681132	Lon: -58.44516
64	Lago Lugano	Buenos Aires	Lat: -34.681132	Lon: -58.44516
65	Lago Lugano	Buenos Aires	Lat: -34.681132	Lon: -58.44516
66	Villa Crespo, Buenos Aires city	Buenos Aires	Lat: -34.601424	Lon: -58.443357
67	Intendente Güiraldes 2160, Buenos Aires, C1704 CABA	Buenos Aires	Lat: -34.538547	Lon: -58.443664
68	Isla Martín García	San Fernando	Lat: -34.182483	Lon: -58.249109
69	Acassuso	San Isidro	Lat: -34.470017	Lon: -58.496232		3788.93	14887.7
70	Acassuso	San Isidro	Lat: -34.470017	Lon: -58.496232		1584.92	11887.1
71	La Merced	Cerillos	Lat: -24.961908	Lon: -65.486782		7666.84	775.81
72	La Plata	Buenos Aires	Lat: -34.90748	Lon: -57.929908		14490.8	27550.7
73	Reserva ecológica cuidad universitaria-costanera	Buenos Aires	Lat: -34.538275	Lon: -58.444113		24610.4
74	Establecimiento Los Quebrachos	Sargento Cabral	Lat: -26.810796	Lon: -59.596997		9369.11
75	Barrancas de Belgrano	Buenos Aires	Lat: -34.554274	Lon: -58.441022		20487.8
						81998.8
